# Supplementary material for: Hot-band absorption assisted single-photon frequency upconversion luminescent nanophotosensitizer for 808 nm light triggered photodynamic immunotherapy of cancer
Source: Royal Society of Chemistry journal article supplement (doi:10.1039/d2bm01700h), 2023-01-01
Supplement: d2bm01700h1.pdf [file d2bm01700h1.pdf]

## Supporting Information

### **Hot-Band Absorption Assisted Single-Photon Frequency Upconversion Luminescent Nanophotosensitizer for 808 nm Light Triggered Photodynamic Immunotherapy of Cancer**

Hui Yu,<sup>‡a</sup> Qing Wang,<sup>‡b</sup> Xinmiao Zhang,<sup>b</sup> Aliya Tiemuer,<sup>a</sup> Jing Wang,<sup>a</sup> Yuanyuan  
Zhang,<sup>a</sup> Xiaolian Sun<sup>\*b</sup> and Yi Liu<sup>\*a</sup>

<sup>a</sup> Department of Biomedical Engineering, School of Engineering, China Pharmaceutical  
University, Nanjing, 211198, China. Email: [yiliu@cpu.edu.cn](mailto:yiliu@cpu.edu.cn)

<sup>b</sup> Department of Pharmaceutical Analysis, School of Pharmaceutical Sciences, China  
Pharmaceutical University, Nanjing, 211198, China. Email: [xiaolian\\_sun@cpu.edu.cn](mailto:xiaolian_sun@cpu.edu.cn)

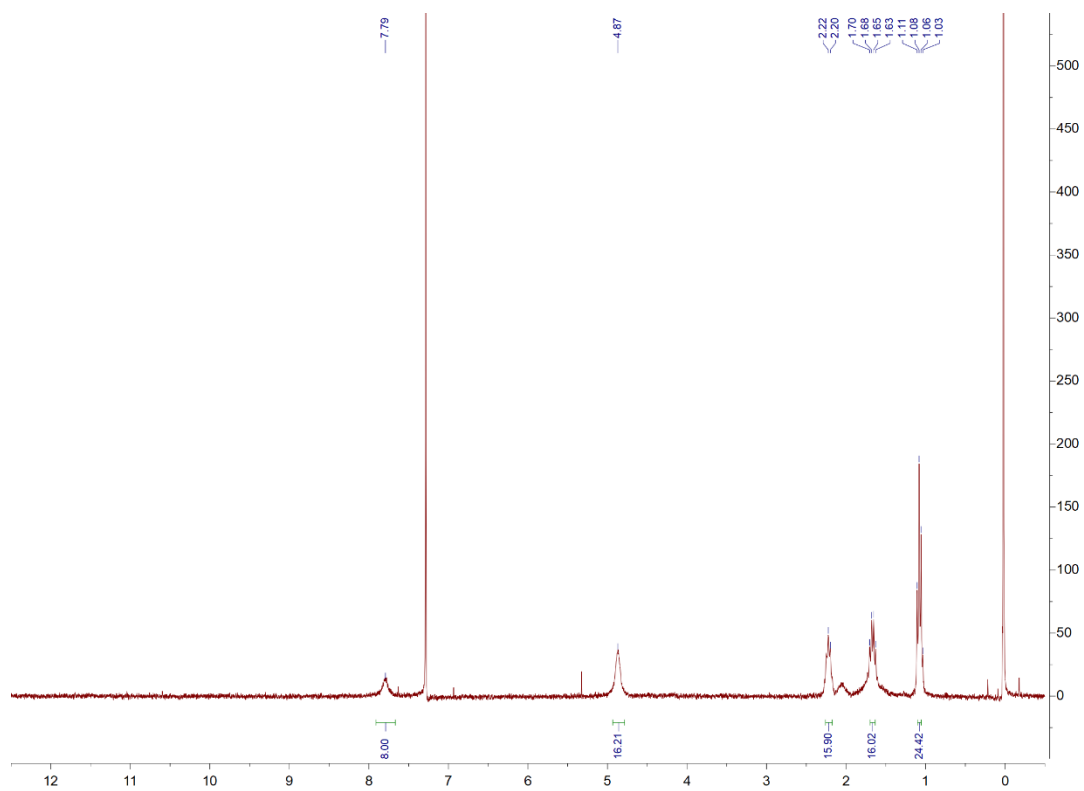

**Fig. S1** The  $^1\text{H}$  NMR spectrum of compound  $\text{H}_2\text{Pc}(\text{OBu})_8$ .

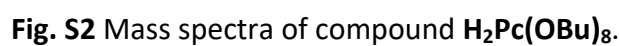

**Fig. S2** Mass spectra of compound  $\text{H}_2\text{Pc}(\text{OBu})_8$ .

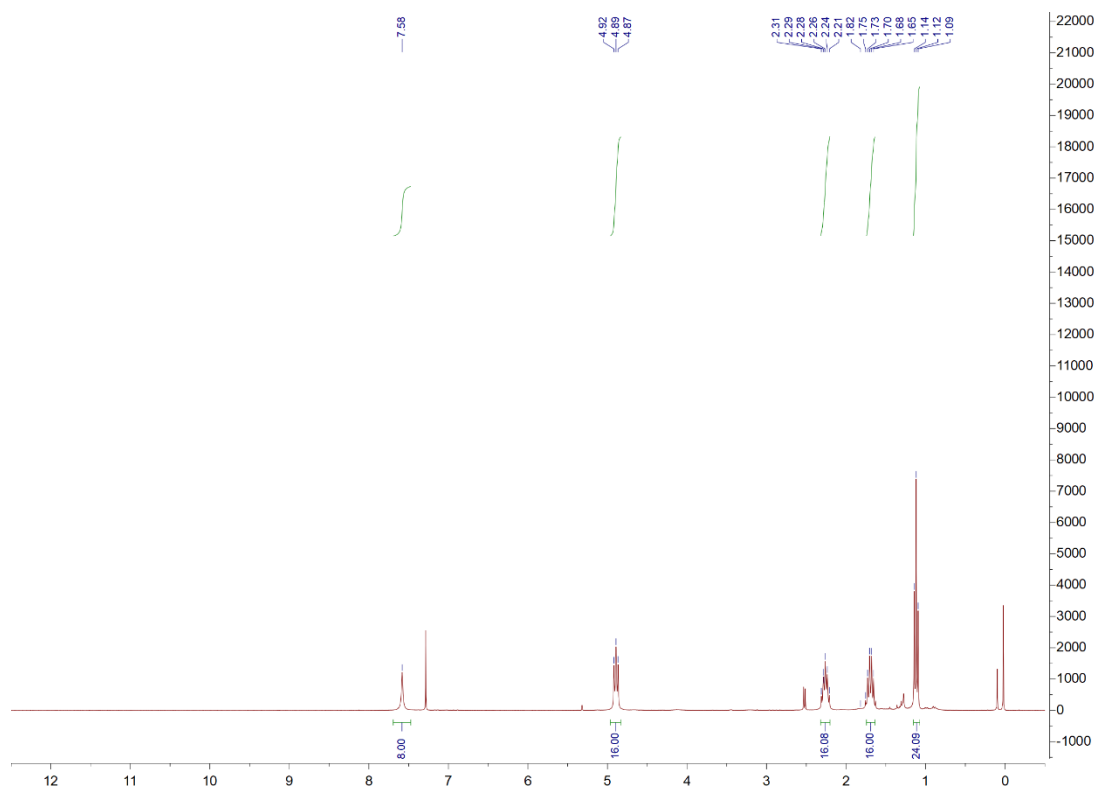

**Fig. S3** The  $^1\text{H}$  NMR spectrum of compound  $\text{PdPc}(\text{OBu})_8$ .

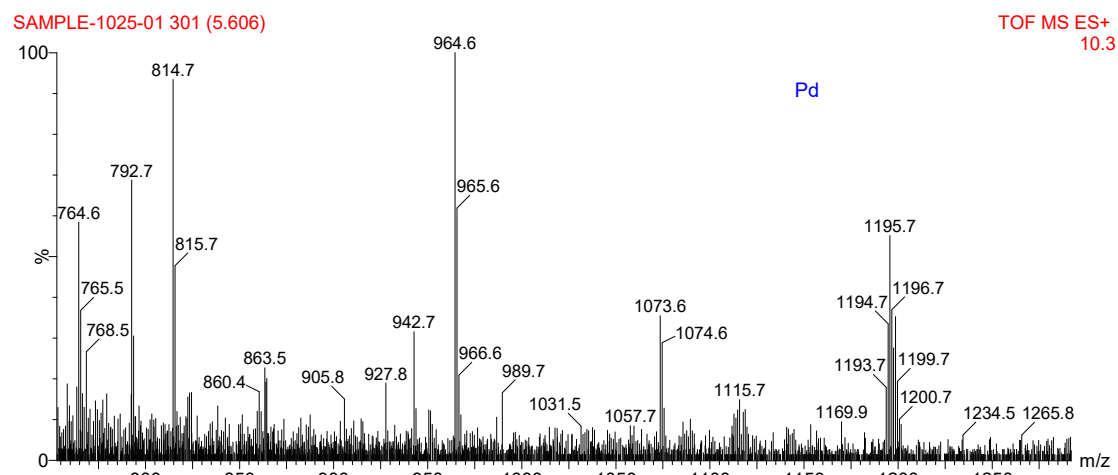

Fig. S4 Mass spectra of compound  $\text{PdPc}(\text{OBu})_8$ .

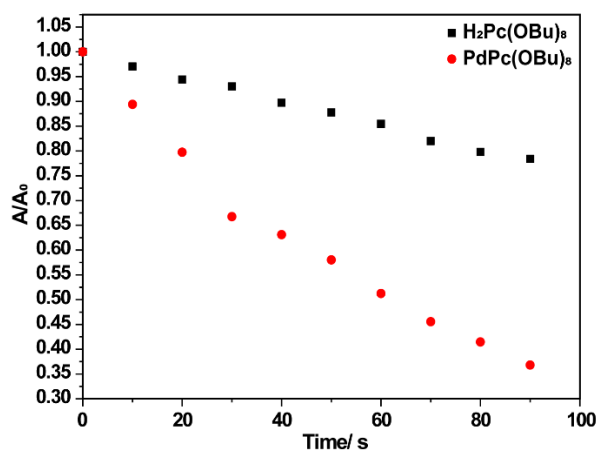

**Fig. S5** The absorption change of DPBF at 410 nm after  $H_2Pc(OBu)_8$  and  $PdPc(OBu)_8$  under 808 nm irradiation.

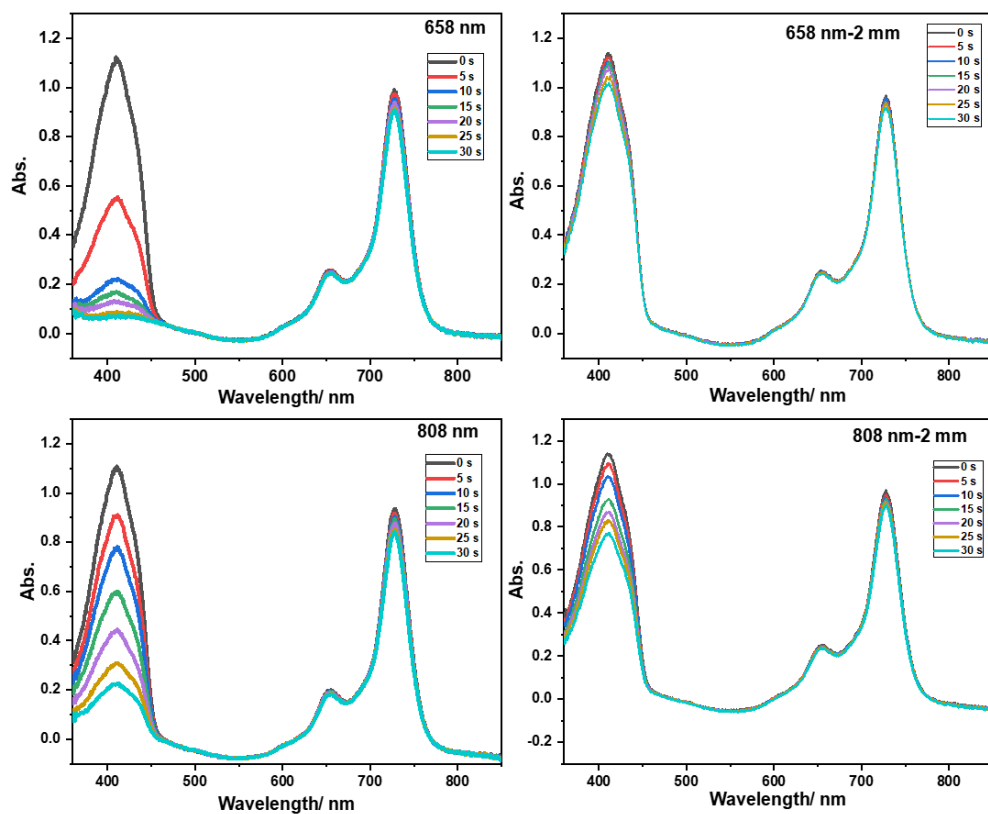

**Fig. S6** The absorption change of DPBF with PdPc(OBu)<sub>8</sub> under 658 nm or 808 nm irradiation.

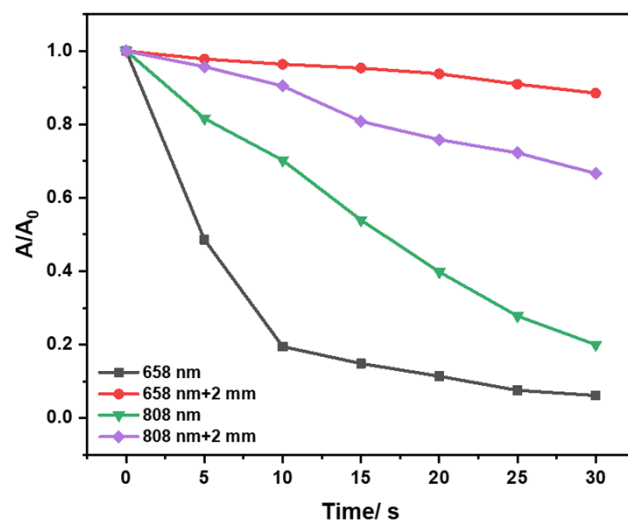

**Fig. S7** The absorption change of DPBF with PdPc(OBu)<sub>8</sub> at 410 nm under 658 nm or 808 nm irradiation.

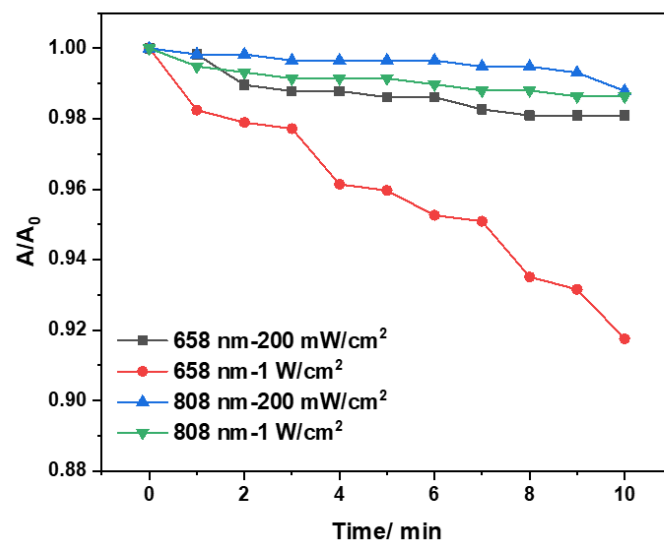

**Fig. S8** The photostability of PdPc(OBu)<sub>8</sub> under 658 nm or 808 nm irradiation.

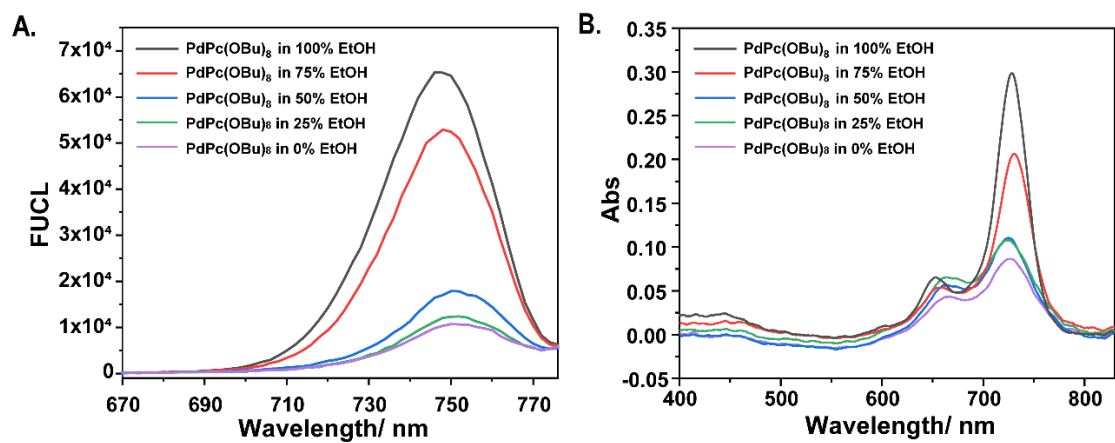

**Fig. S9** FUEL emission spectra (Ex= 808 nm) and absorption spectra of  $\text{PdPc(OBu)}_8$  in different proportions of ethanol-water solutions.

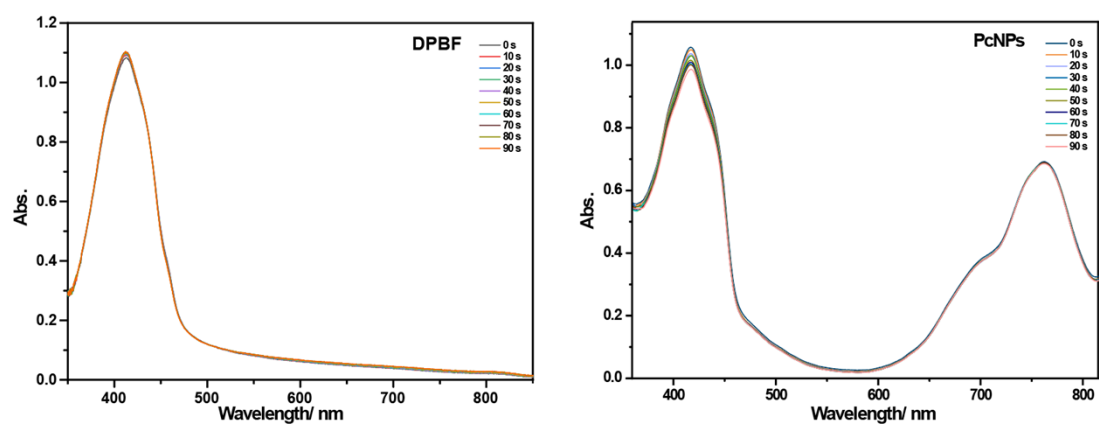

**Fig. S10** The absorption changes of DPBF or DPBF with PcNPs under 808 nm irradiation.

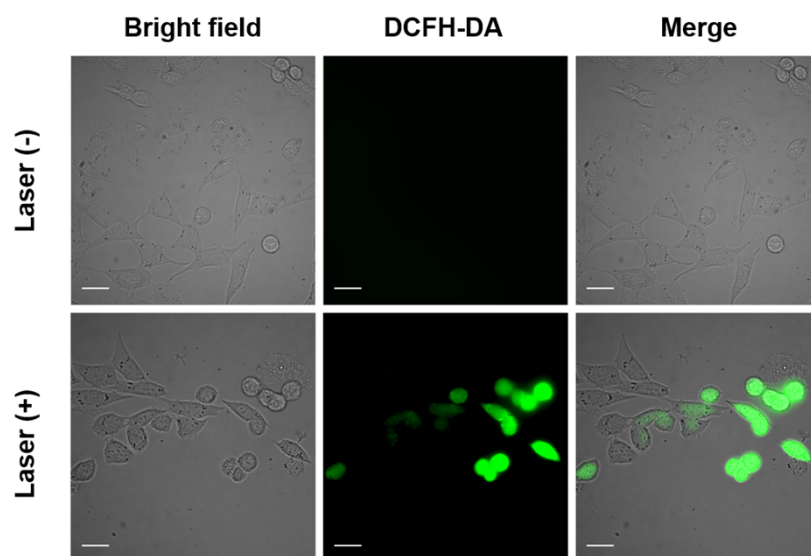

**Fig. S11** The ROS detection in U87MG cells incubated with PdPc NPs with different treatments.

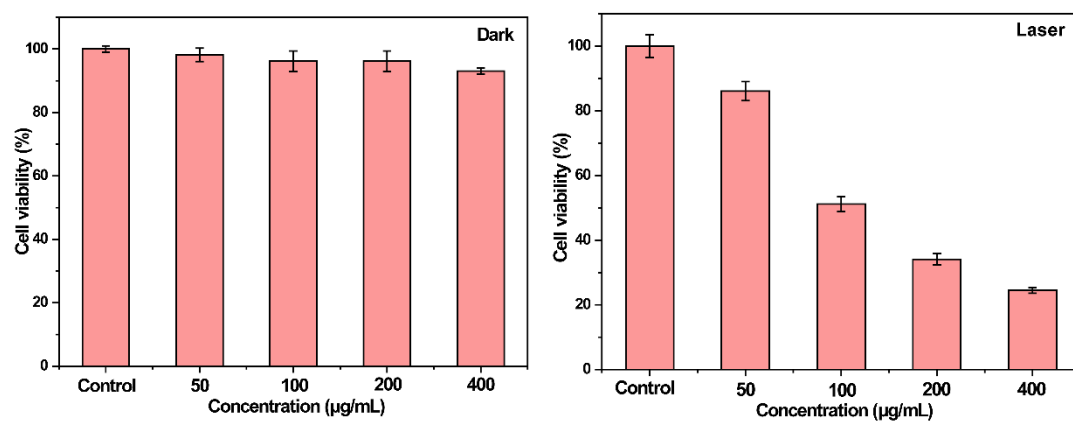

**Fig. S12** Cell viabilities of U87MG cells incubated with PdPc NPs at various concentrations.

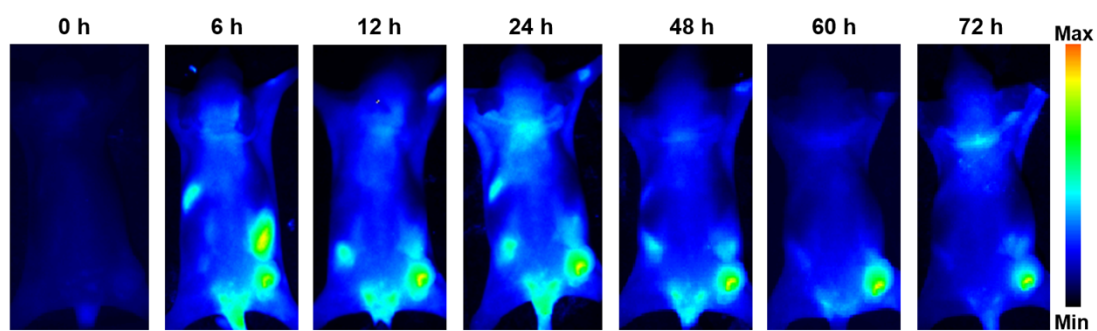

**Fig. S13** Time-dependent *in vivo* images of 4T1 tumor-bearing mice, Ex= 808 nm.

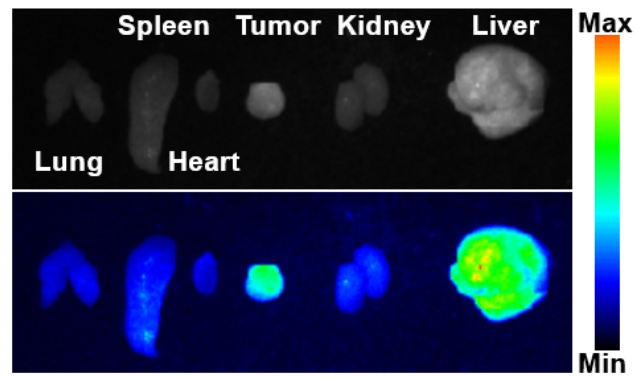

**Fig. S14** Ex *vivo* images of tumor and major organs harvested from 4T1 tumor-bearing mice sacrificed at 24 h.

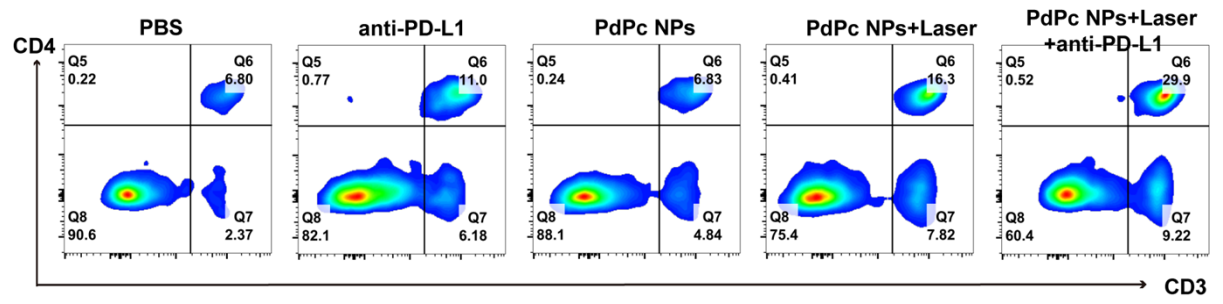

**Fig. S15** Flow cytometric of the intratumor infiltration of cytotoxic T lymphocytes

(CTLs) (CD3+CD4+) (n = 3).
